# Supplementary material
Source: publisher site journal article supplement (https://www.dovepress.com/article/453616)
Supplement: Supplementary file 1 [file get_supplementary_file.php]

| Table S1. Percentage distributions of positive vs. negative screens for substances (other than cannabis) across GCS and mRS levels (N = 3710) | | | | | | | | | |
| --- | --- | --- | --- | --- | --- | --- | --- | --- | --- |
|  | Positive for EtOH | | | Positive for Opioids | | | Positive for Other/Multiple Substances | | |
|  | Yes | No | p | Yes | No | p | Yes | No | p |
| GCS |  |  | <0.001 |  |  | <0.001 |  |  | <0.001 |
| Severe | 18.1 | 13.2 |  | 8.6 | 19.0 |  | 23.1 | 9.3 |  |
| Moderate | 9.3 | 8.2 |  | 6.6 | 9.9 |  | 10.0 | 7.6 |  |
| Mild | 72.6 | 78.7 |  | 84.8 | 71.1 |  | 66.9 | 83.1 |  |
|  |  |  |  |  |  |  |  |  |  |
| Discharge mRS |  |  | 0.113 |  |  | 0.715 |  |  | <0.001 |
| Favorable | 73.8 | 71.2 |  | 72.3 | 71.7 |  | 67.2 | 75.0 |  |
| Poor | 26.2 | 28.8 |  | 27.7 | 28.3 |  | 32.8 | 25.0 |  |
|  |  |  |  |  |  |  |  |  |  |
| 3-month mRS |  |  | 0.689 |  |  | <0.001 |  |  | 0.561 |
| Favorable | 71.9 | 70.9 |  | 76.9 | 66.6 |  | 71.9 | 70.6 |  |
| Poor | 28.1 | 29.1 |  | 23.1 | 33.4 |  | 28.1 | 29.4 |  |
|  |  |  |  |  |  |  |  |  |  |
| 6-month mRS |  |  | 0.118 |  |  | 0.007 |  |  | 0.255 |
| Favorable | 84.0 | 88.0 |  | 90.3 | 84.0 |  | 88.5 | 85.8 |  |
| Poor | 16.0 | 12.0 |  | 9.7 | 16.0 |  | 11.5 | 14.2 |  |
|  |  |  |  |  |  |  |  |  |  |
| 12-month mRS |  |  | 0.372 |  |  | 0.199 |  |  | 0.793 |
| Favorable | 86.6 | 89.4 |  | 90.7 | 87.2 |  | 88.2 | 89 |  |
| Poor | 13.4 | 10.6 |  | 9.3 | 12.8 |  | 11.8 | 11.0 |  |
|  |  |  |  |  |  |  |  |  |  |
| 24-month mRS |  |  | 0.413 |  |  | 0.272 |  |  | 0.290 |
| Favorable | 92.6 | 89.6 |  | 92.5 | 88.9 |  | 92.5 | 89.1 |  |
| Poor | 7.4 | 10.4 |  | 7.5 | 11.1 |  | 7.5 | 10.9 |  |
|  |  |  |  |  |  |  |  |  |  |
| Last mRS |  |  | 0.134 |  |  | 0.432 |  |  | 0.124 |
| Favorable | 93.5 | 91.0 |  | 92.4 | 91.5 |  | 90.4 | 92.7 |  |
| Poor | 6.5 | 9.0 |  | 7.6 | 8.8 |  | 9.6 | 7.3 |  |
|  |  |  |  |  |  |  |  |  |  |
| GCS=Glasgow Coma Scale; EtOH=ethanol. | | | | |  |  |  |  |  |
